# Supplementary material
Source: publisher figshare collection journal article supplement (https://acs.figshare.com/ndownloader/files/5711994)
Supplement: Supplementary file 1 [file 5711994]

# Inorganic Chemistry

including bioinorganic chemistry

Inorg. Chem., 1998, 37(26), 6898-6905, DOI: [10.1021/ic980843f](https://doi.org/10.1021/ic980843f)

## Terms & Conditions

Electronic Supporting Information files are available without a subscription to ACS Web Editions. The American Chemical Society holds a copyright ownership interest in any copyrightable Supporting Information. Files available from the ACS website may be downloaded for personal use only. Users are not otherwise permitted to reproduce, republish, redistribute, or sell any Supporting Information from the ACS website, either in whole or in part, in either machine-readable form or any other form without permission from the American Chemical Society. For permission to reproduce, republish and redistribute this material, requesters must process their own requests via the RightsLink permission system. Information about how to use the RightsLink permission system can be found at <http://pubs.acs.org/page/copyright/permissions.html>

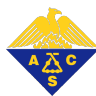

ACS Publications

MOST TRUSTED. MOST CITED. MOST READ.

Copyright © 1998 American Chemical Society

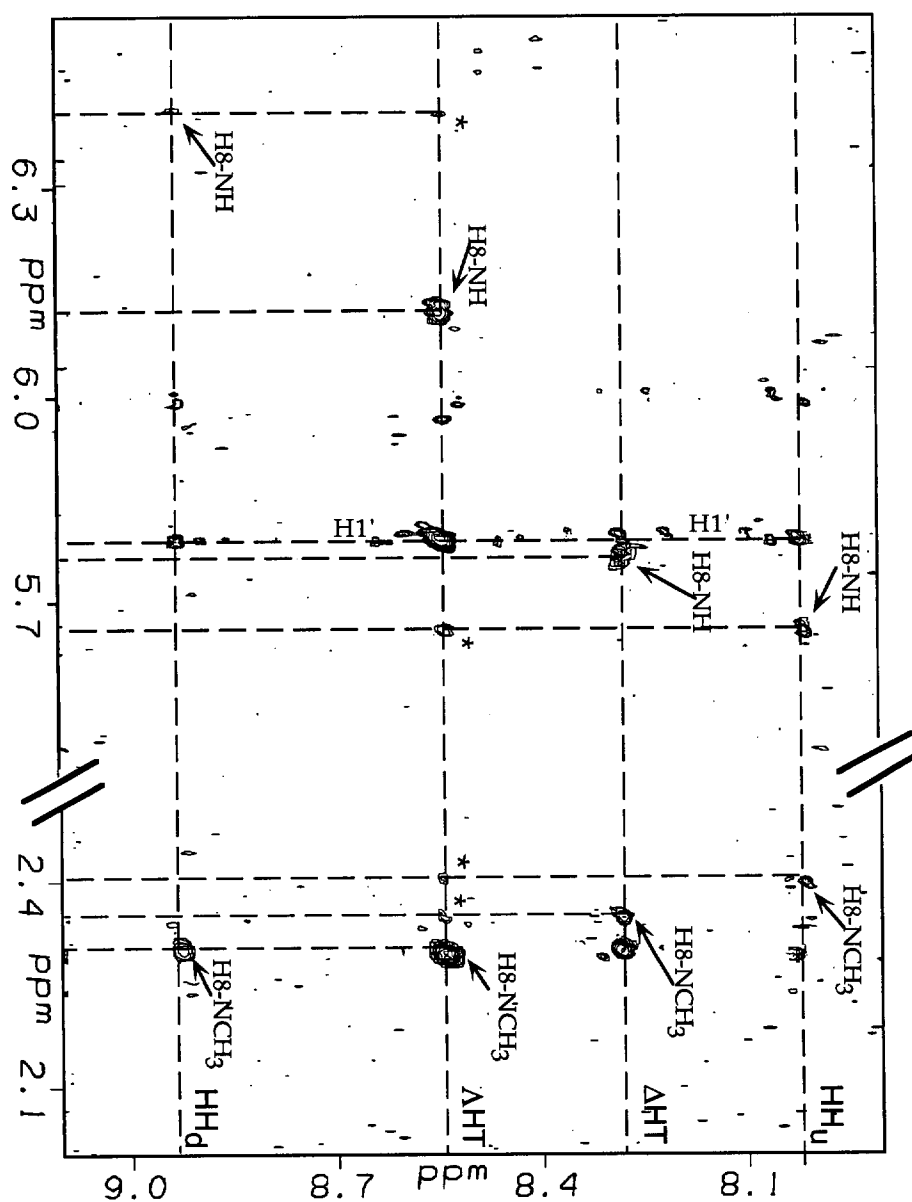

**Figure S1.** H8/NH-H1' and H8-NCH<sub>3</sub> regions of the NOESY/EXSY spectrum (5 °C) of (*S,R,R,S*)-Me<sub>2</sub>DABPt(5'-GMP)<sub>2</sub> with the NOE cross-peaks labeled. The asterisks mark exchange cross-peaks.

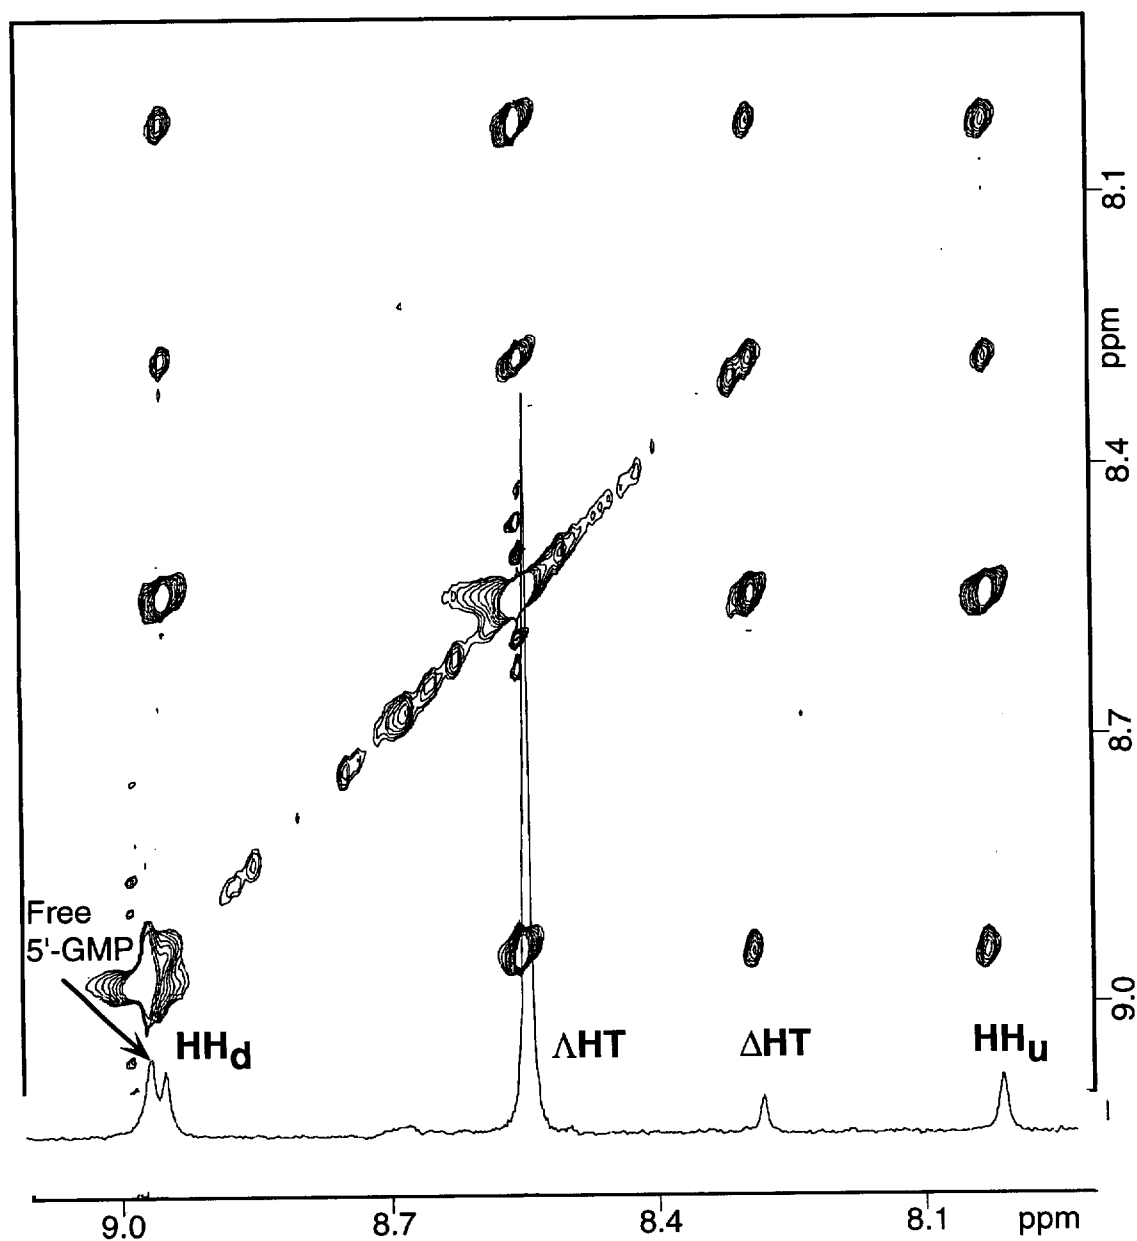

**Figure S2.** H8 region of the NOESY/EXSY spectrum (5 °C) of  $(S,R,R,S)\text{-Me}_2\text{DABPt}(5'\text{-GMP})_2$  showing the H8-H8 exchange cross-peak network. The H8 signals in the 1D spectrum are labeled in the insert.

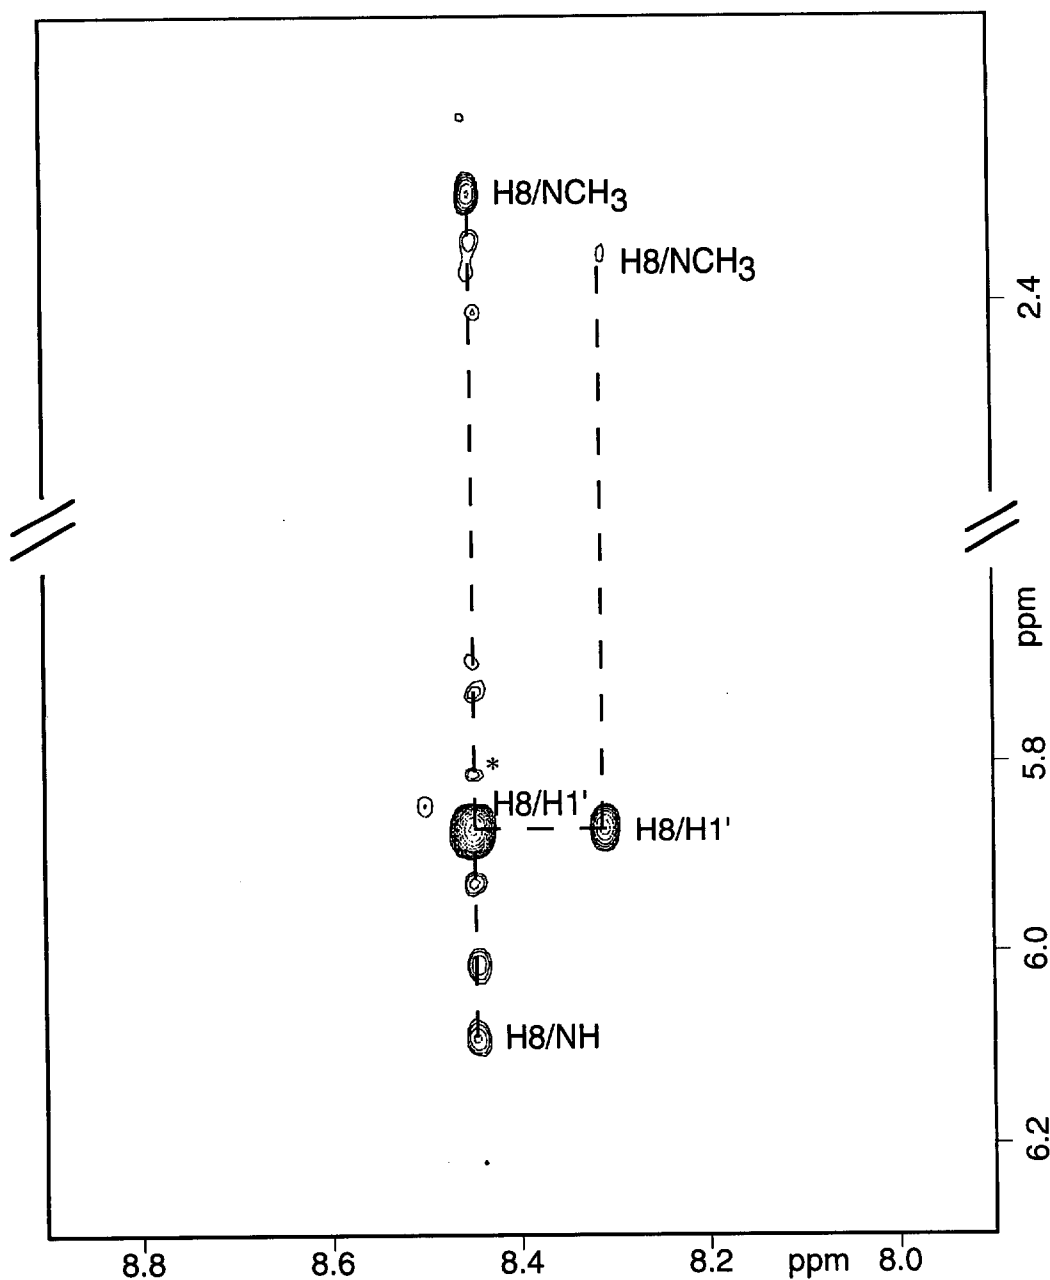

**Figure S3.** H8/NH-H1' and H8-NCH<sub>3</sub> regions of the NOESY/EXSY spectrum (5 °C) of (*S,R,R,S*)-**Me<sub>2</sub>DABPt**(3'-GMP)<sub>2</sub> with the NOE cross-peaks labeled. The asterisks mark exchange cross-peaks.

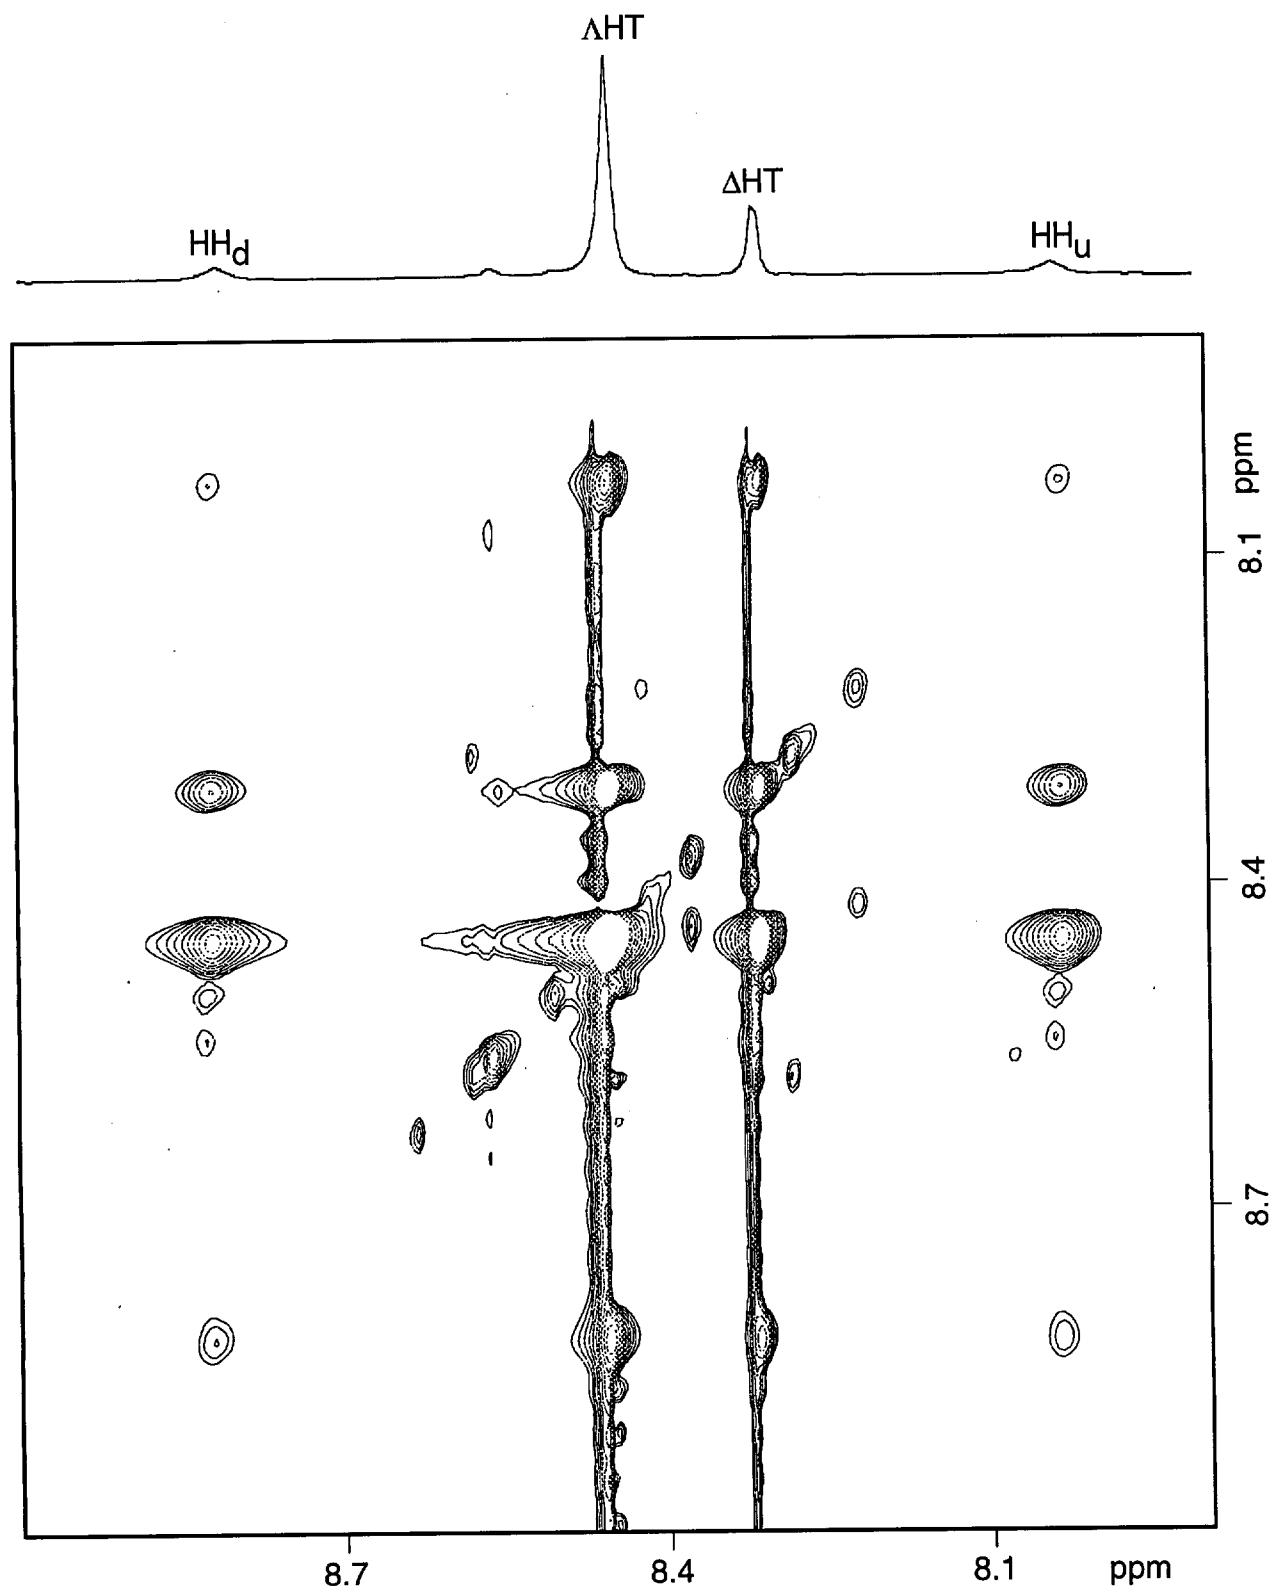

**Figure S4.** H8 region of the NOESY/EXSY spectrum (5 °C) of  $(S,R,R,S)\text{-Me}_2\text{DABPt}(3'\text{-GMP})_2$  showing the H8-H8 exchange cross-pipe network. The H8 signals in the 1D spectrum are labeled in the insert.

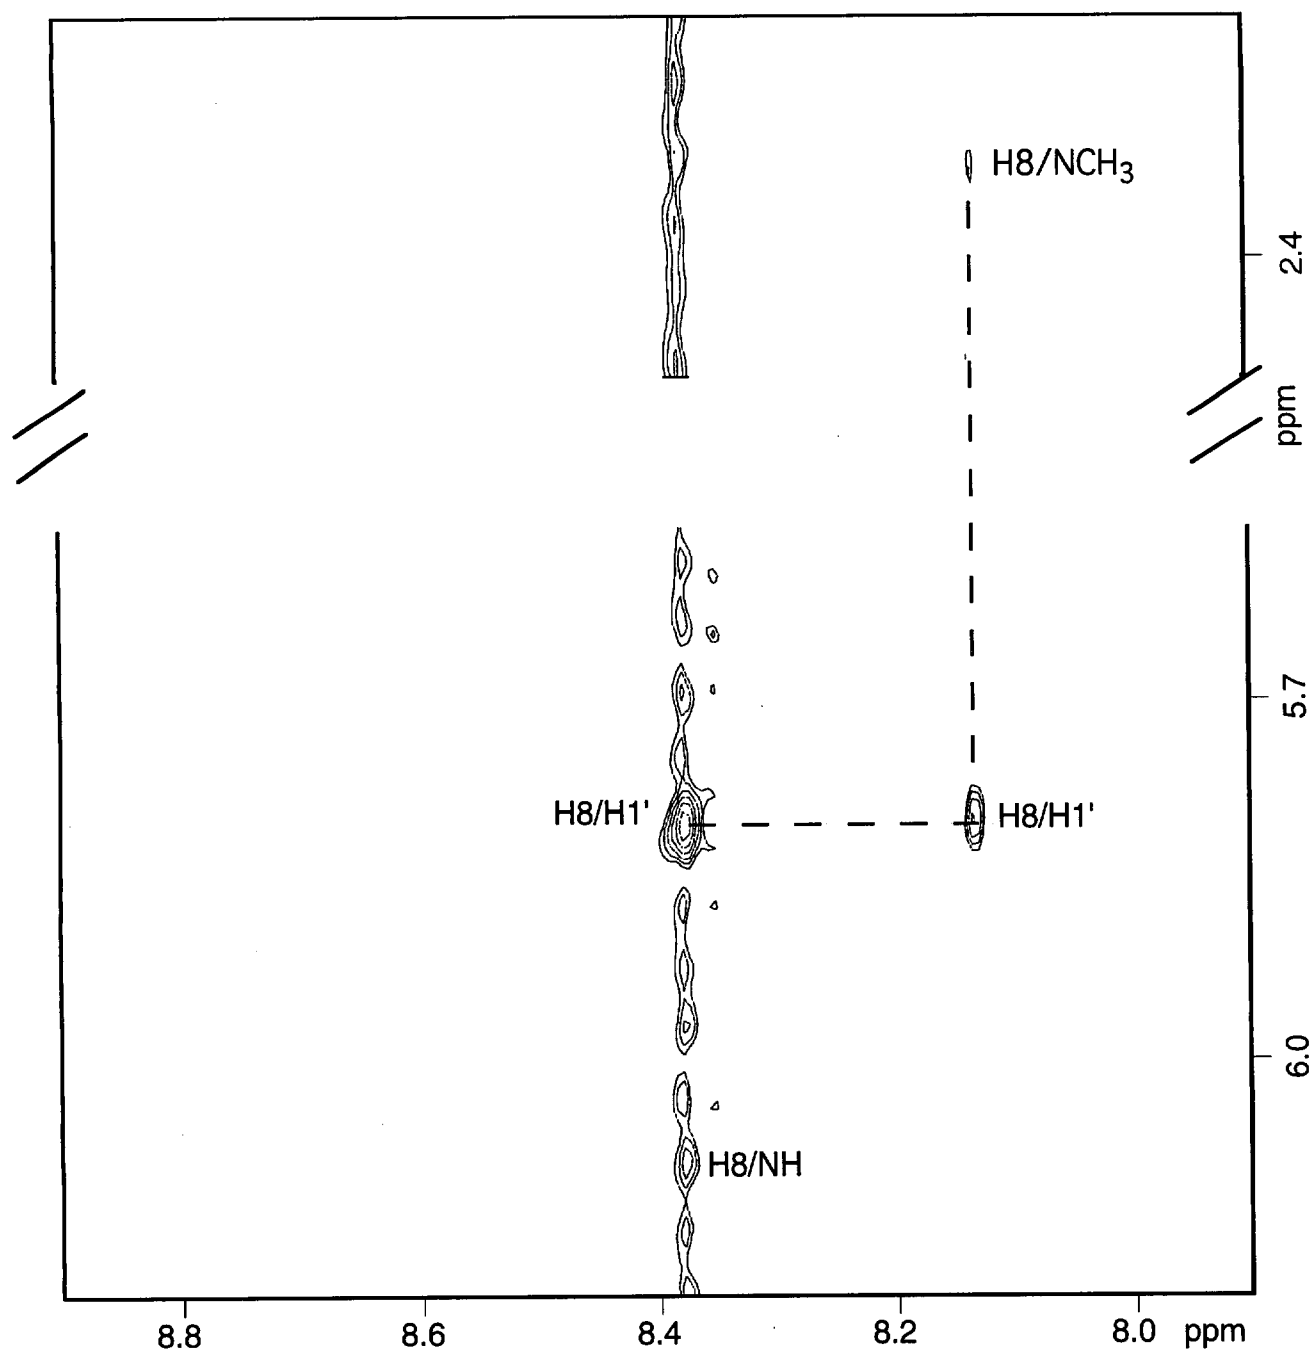

**Figure S5.** H8/NH-H1' and H8-NCH<sub>3</sub> regions of the NOESY/EXSY spectrum (5 °C) of (*S,R,R,S*)-Me<sub>2</sub>DABPt(1-MeGuo)<sub>2</sub> with the NOE cross-peaks labeled.

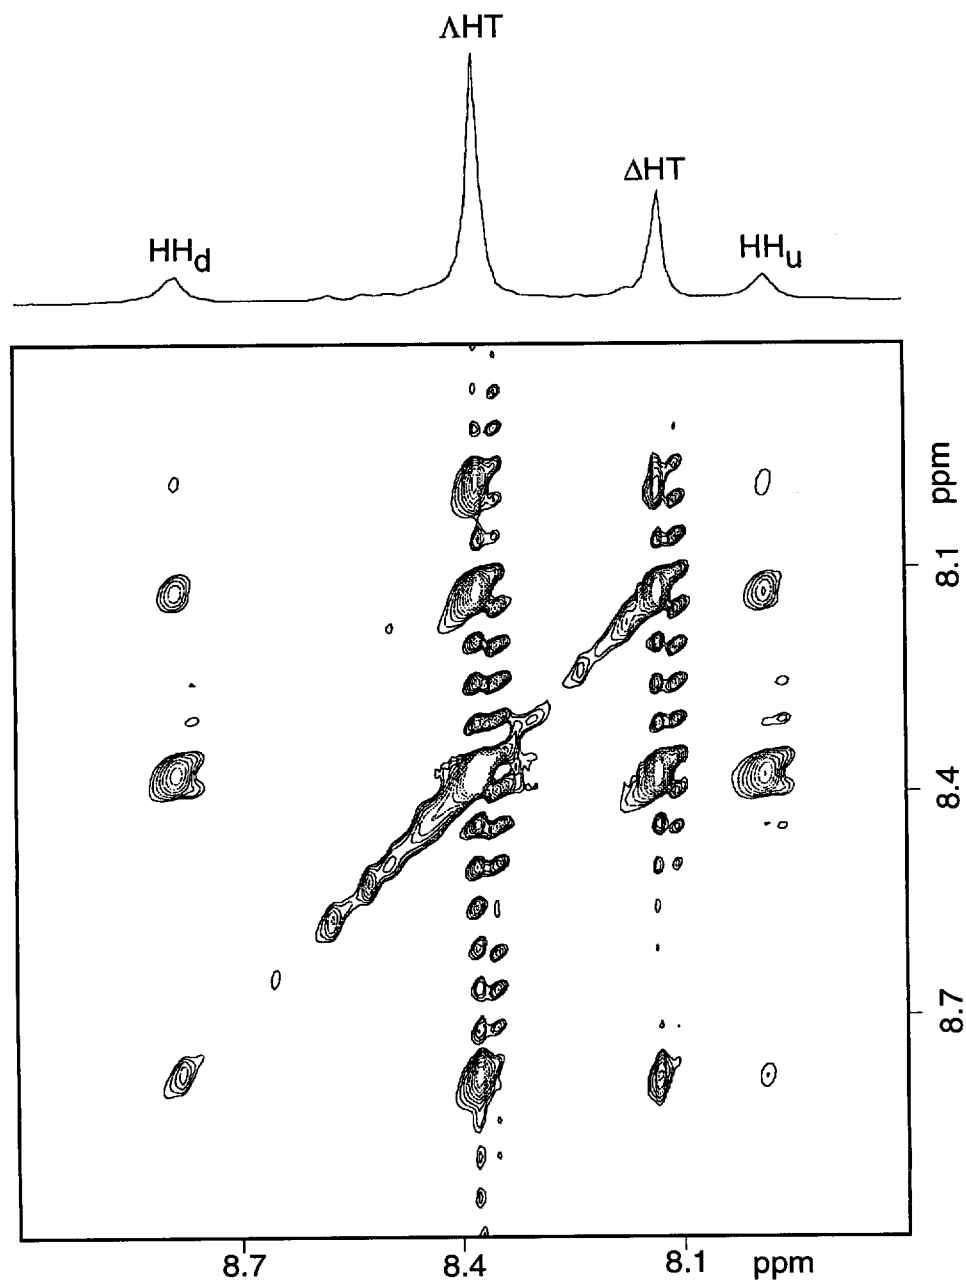

**Figure S6.** H8 region of the NOESY/EXSY spectrum (5 °C) of  $(S,R,R,S)\text{-Me}_2\text{DABPt}(1\text{-MeGuo})_2$  showing the H8-H8 exchange cross-peak network. The H8 signals in the 1D spectrum are labeled in the insert.

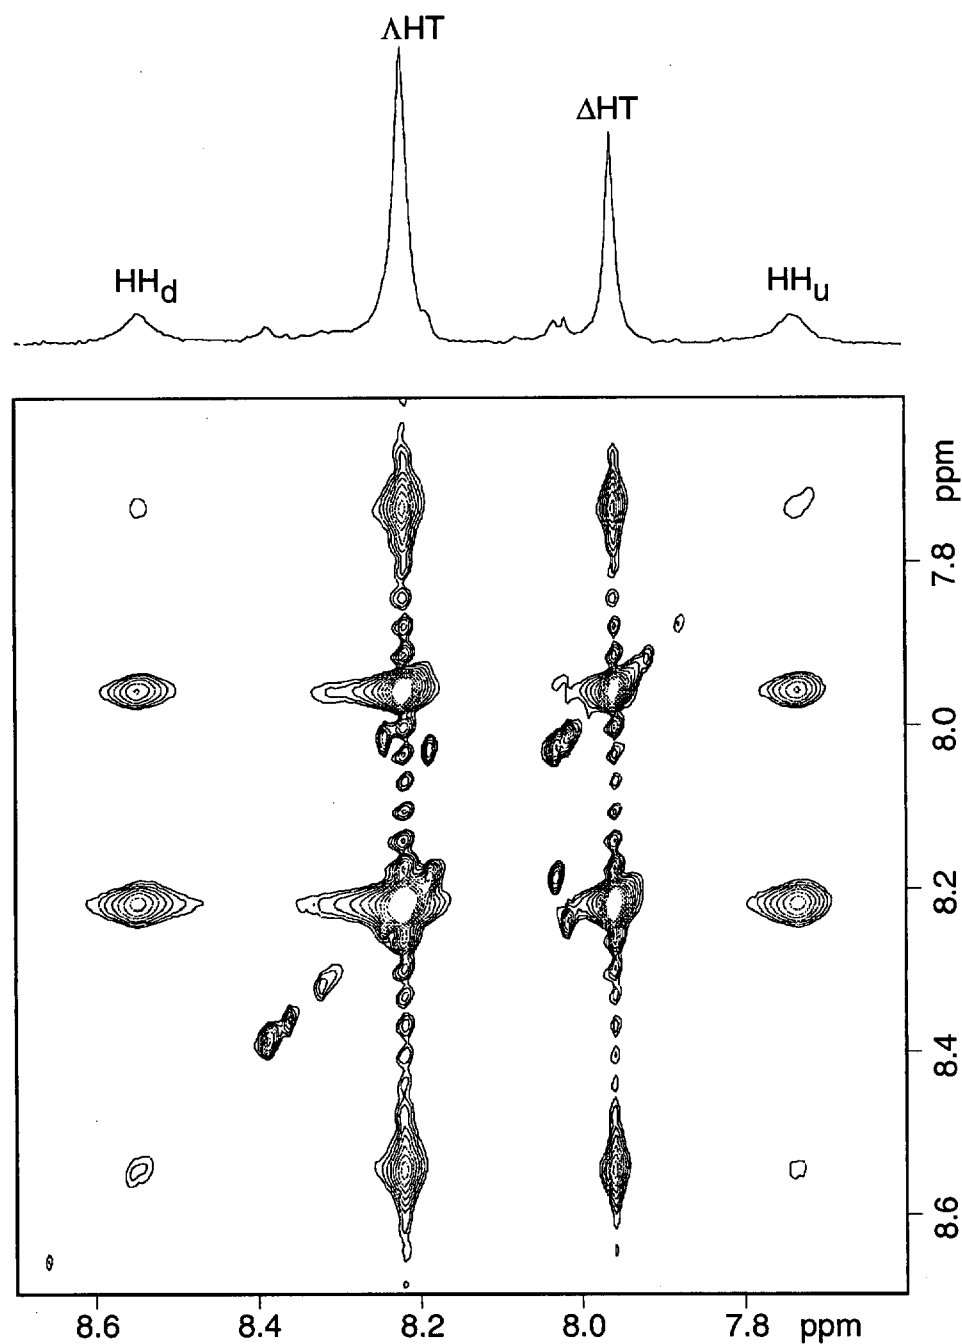

**Figure S7.** H8 region of the NOESY/EXSY spectrum (5 °C) of  $[(S,R,R,S)\text{-Me}_2\text{DABPt}(9\text{-EtG})_2]^{2+}$  showing the H8-H8 exchange cross-peak network. The H8 signals in the 1D spectrum are labeled in the insert.



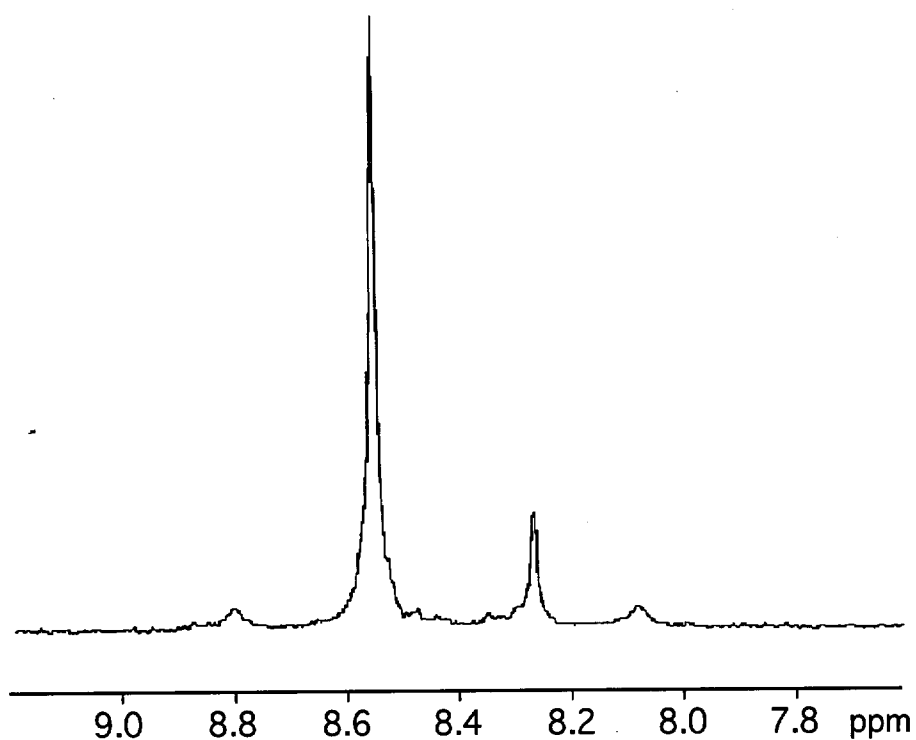

**Figure S8.** H8  $^1\text{H}$  NMR region of  $(R,S,S,R)\text{-Me}_2\text{DABPt}(3'\text{-GMP})_2$  at pH 3.

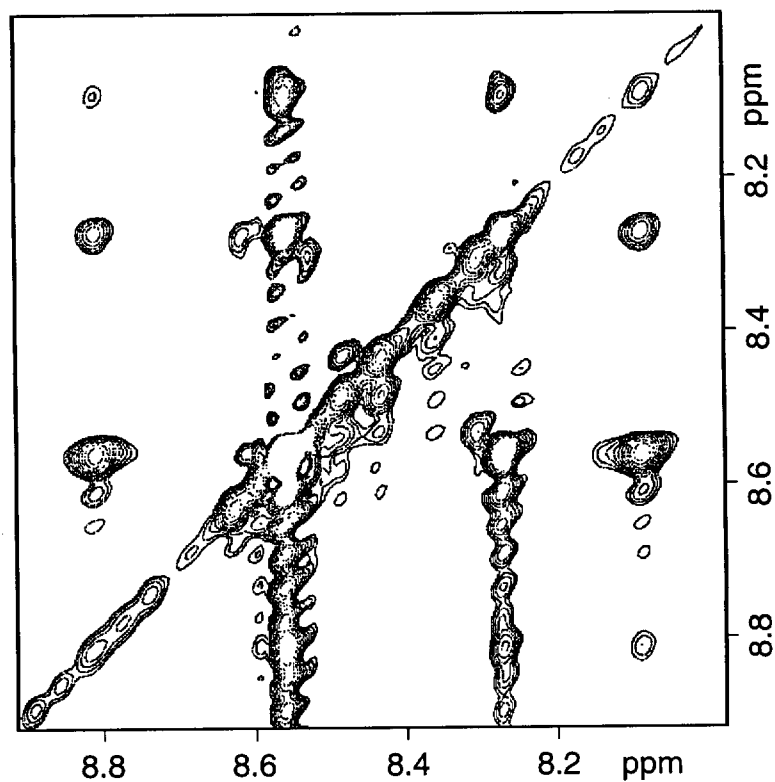

**Figure S9.** H8 region of the NOESY/EXSY spectrum of *(R,S,S,R)*-**Me<sub>2</sub>DABPt(3'-GMP)<sub>2</sub>** showing the H8-H8 exchange cross-peak network.

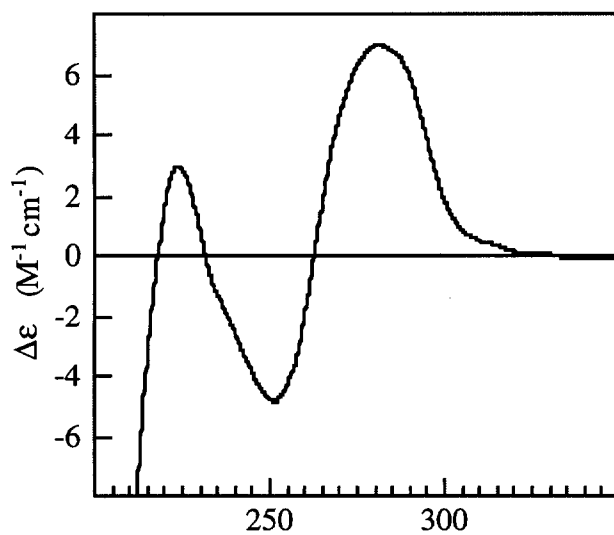

**Figure S10.** CD spectrum of  $(S,R,R,S)\text{-Me}_2\text{DABPt}(\text{Guo})_2$  at pH 3.
